# Supplementary material
Source: bioRxiv or medRxiv preprint supplement (https://www.biorxiv.org/highwire/filestream/109596/field_highwire_adjunct_files/0/362293-1.pdf)
Supplement: Supplementary file [file 362293-1.pdf]

**a.**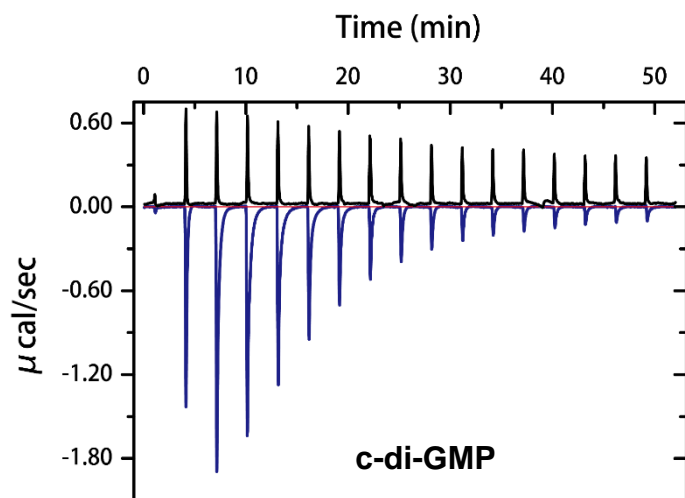**b.**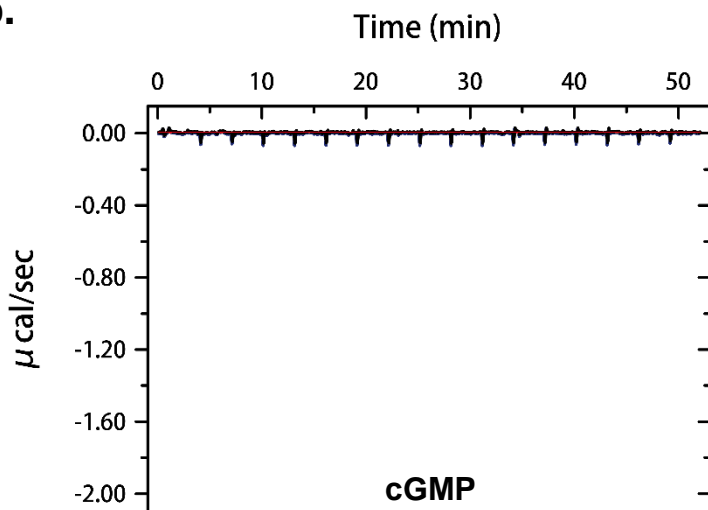**c.**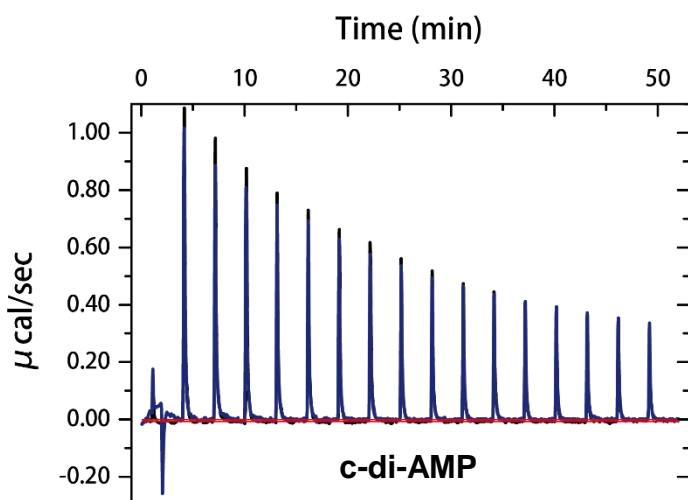**d.**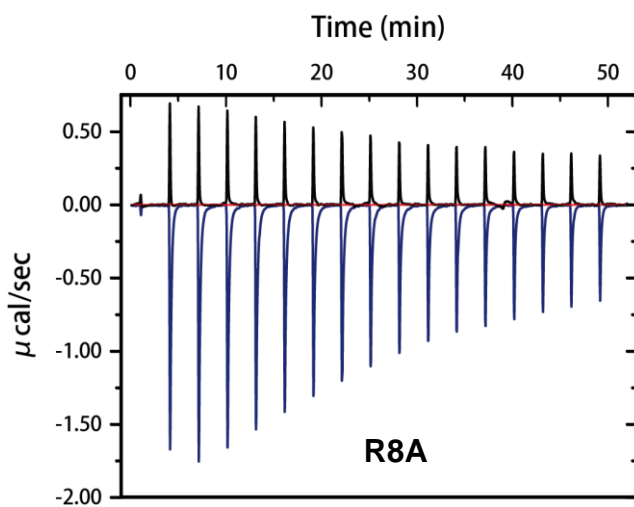**e.**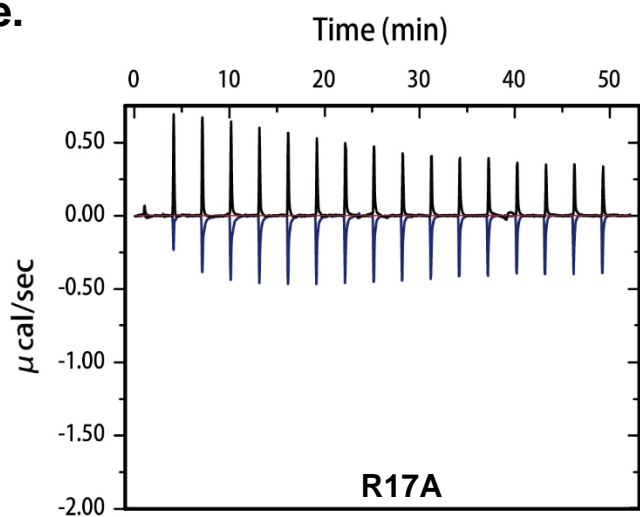**f.**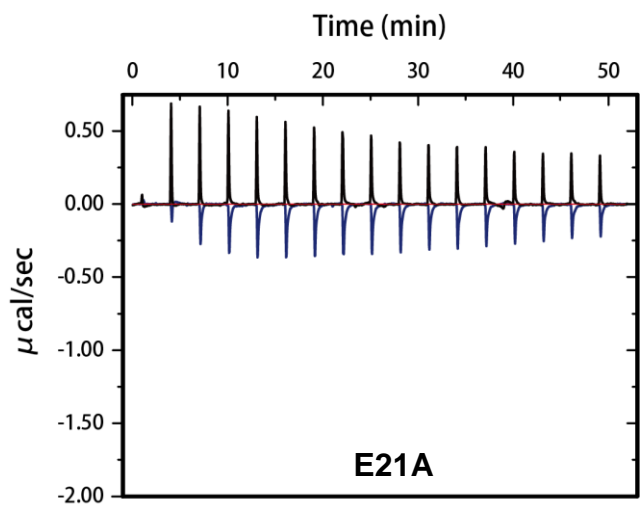

a.

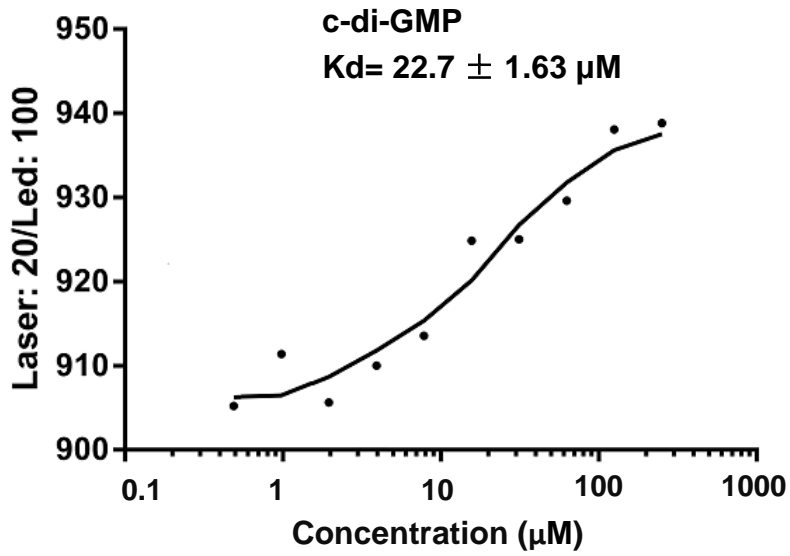

b.

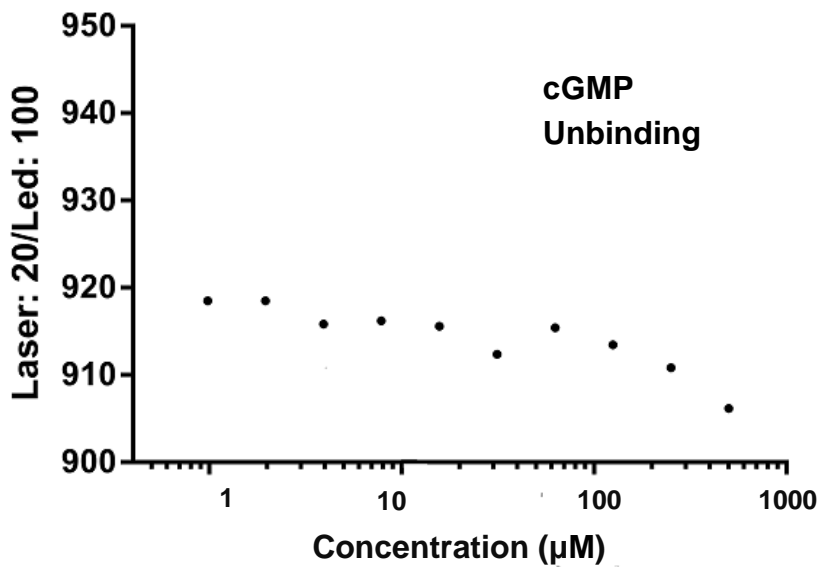

**a.**

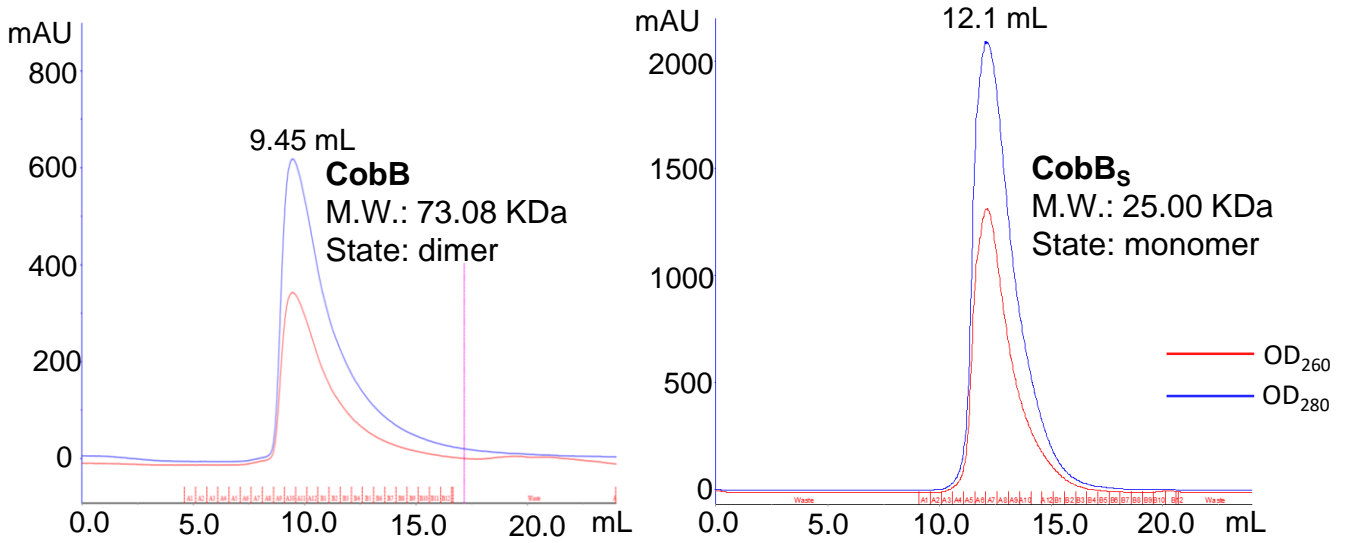

**b.**

|                         |   |   |   |   |
|-------------------------|---|---|---|---|
| <b>UV cross-linking</b> | + | + | - | - |
| <b>CobB</b>             | + | - | + | - |
| <b>CobB<sub>S</sub></b> | - | + | - | + |

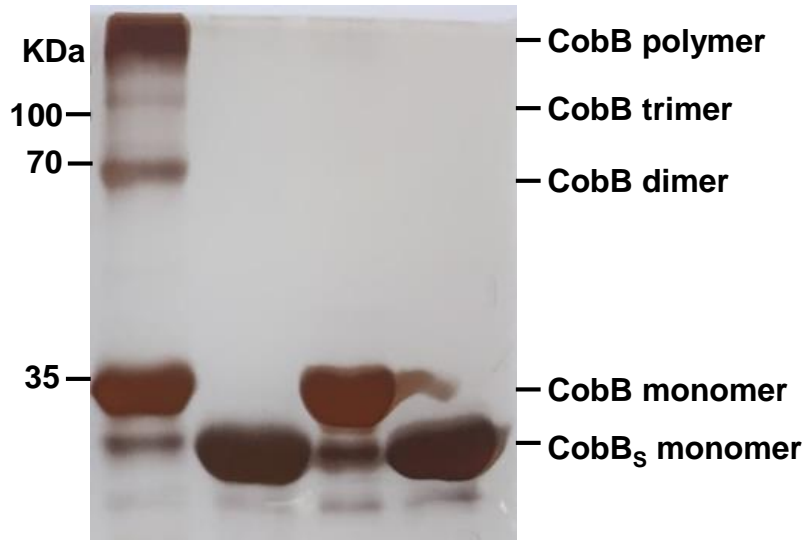

**a.**

|                     |   |     |   |     |     |     |     |
|---------------------|---|-----|---|-----|-----|-----|-----|
| Acs                 | + | +   | + | +   | +   | +   | +   |
| CobB                | - | -   | + | +   | +   | +   | +   |
| c-di-GMP ( $\mu$ M) | - | 500 | - | 250 | 500 | -   | -   |
| cGMP ( $\mu$ M)     | - | -   | - | -   | -   | 500 | -   |
| c-di-AMP ( $\mu$ M) | - | -   | - | -   | -   | -   | 500 |

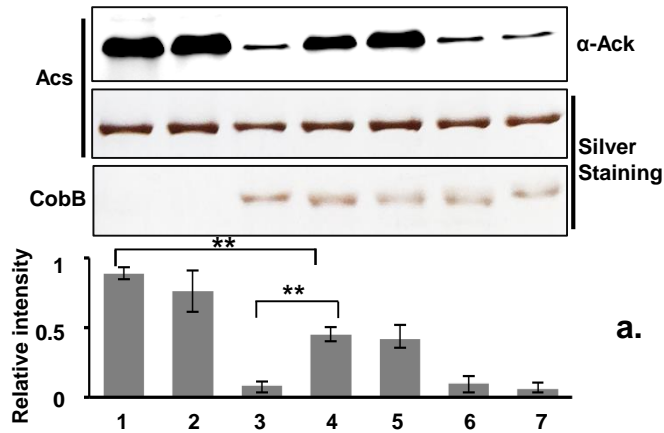**a.****b.**

|                     |   |     |   |     |     |     |     |
|---------------------|---|-----|---|-----|-----|-----|-----|
| CheY                | + | +   | + | +   | +   | +   | +   |
| CobB                | - | -   | + | +   | +   | +   | +   |
| c-di-GMP ( $\mu$ M) | - | 500 | - | 250 | 500 | -   | -   |
| cGMP ( $\mu$ M)     | - | -   | - | -   | -   | 500 | -   |
| c-di-AMP ( $\mu$ M) | - | -   | - | -   | -   | -   | 500 |

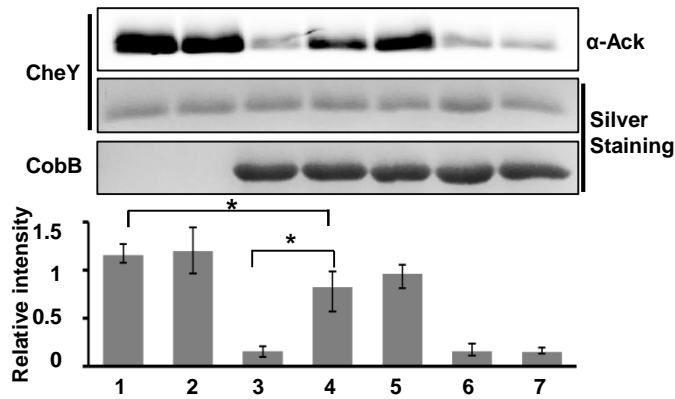**c.**

|                     |   |     |   |     |     |     |     |
|---------------------|---|-----|---|-----|-----|-----|-----|
| NhoA                | + | +   | + | +   | +   | +   | +   |
| CobB                | - | -   | + | +   | +   | +   | +   |
| c-di-GMP ( $\mu$ M) | - | 500 | - | 250 | 500 | -   | -   |
| cGMP ( $\mu$ M)     | - | -   | - | -   | -   | 500 | -   |
| c-di-AMP ( $\mu$ M) | - | -   | - | -   | -   | -   | 500 |

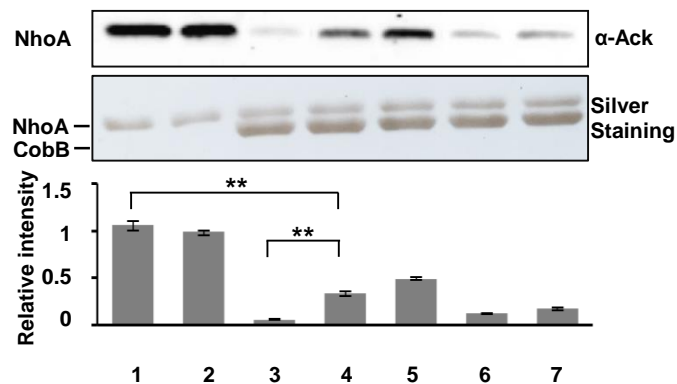

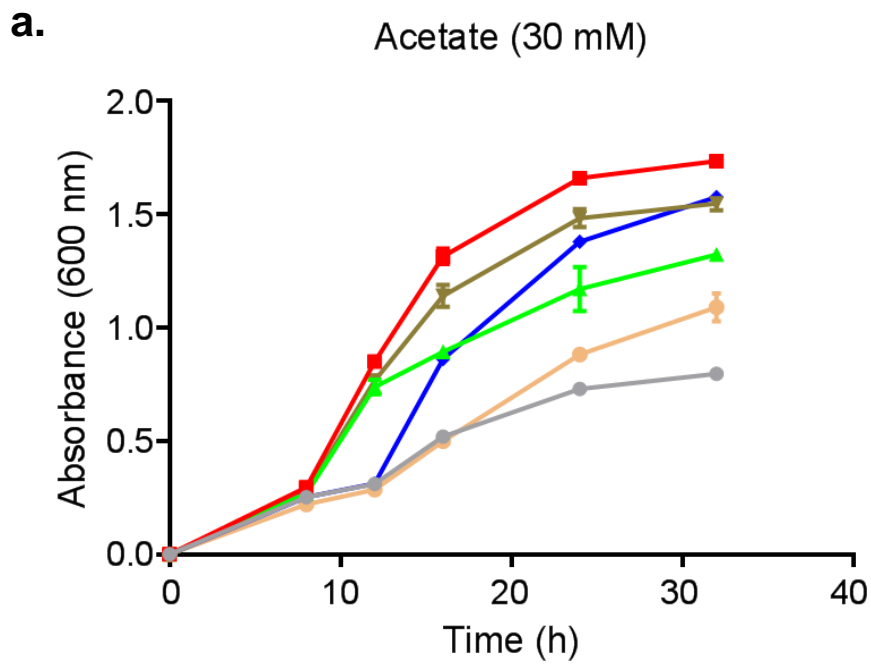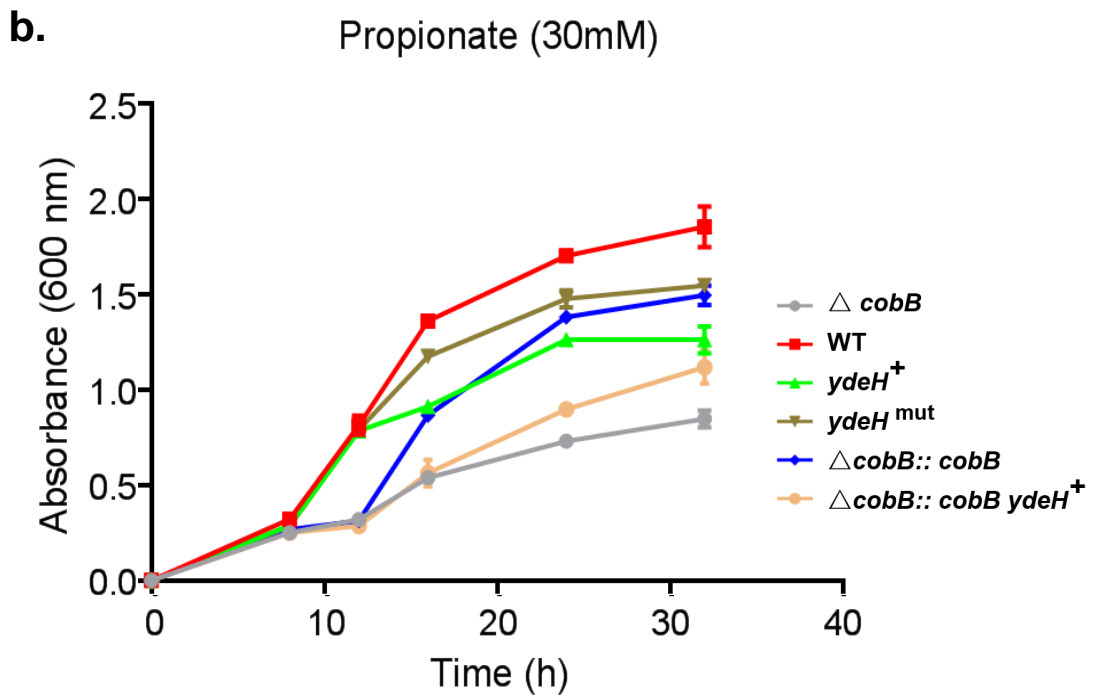

**a.**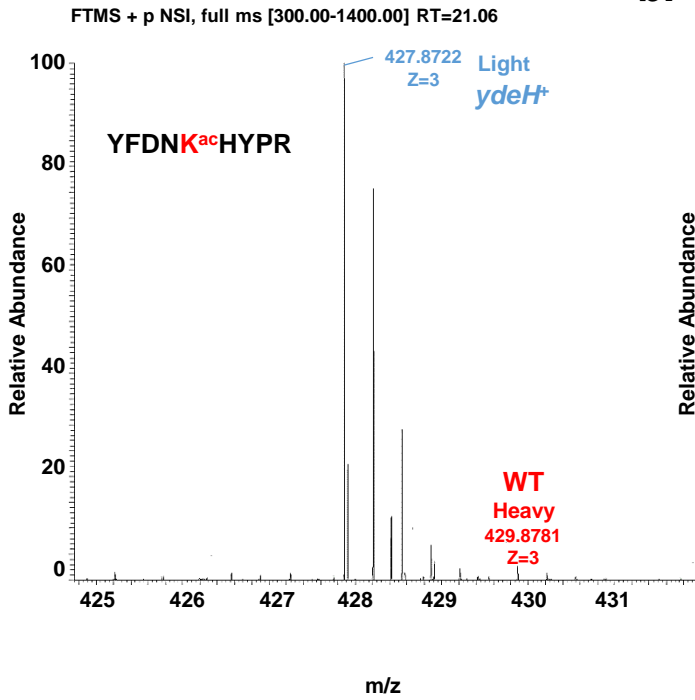**b.**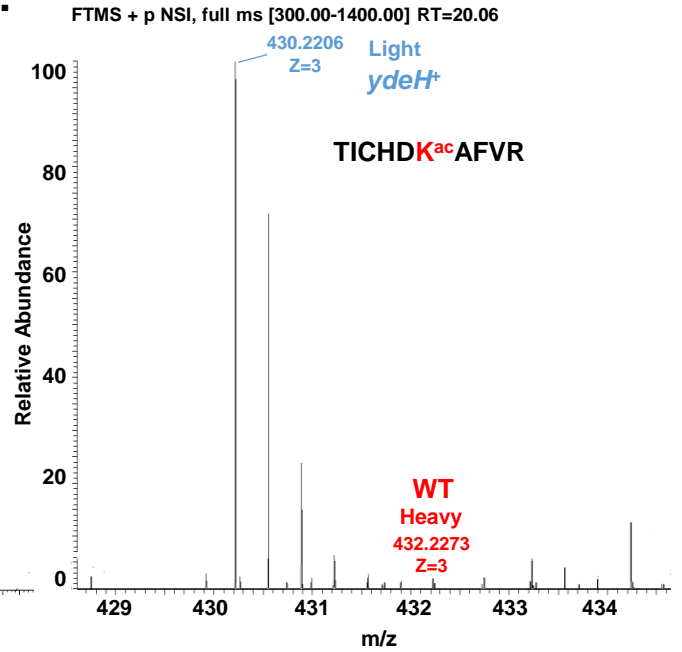**c.**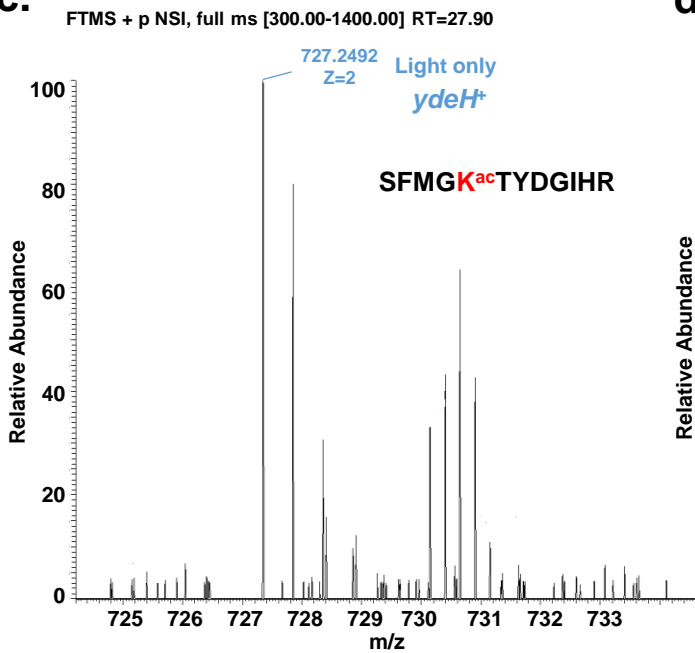**d.**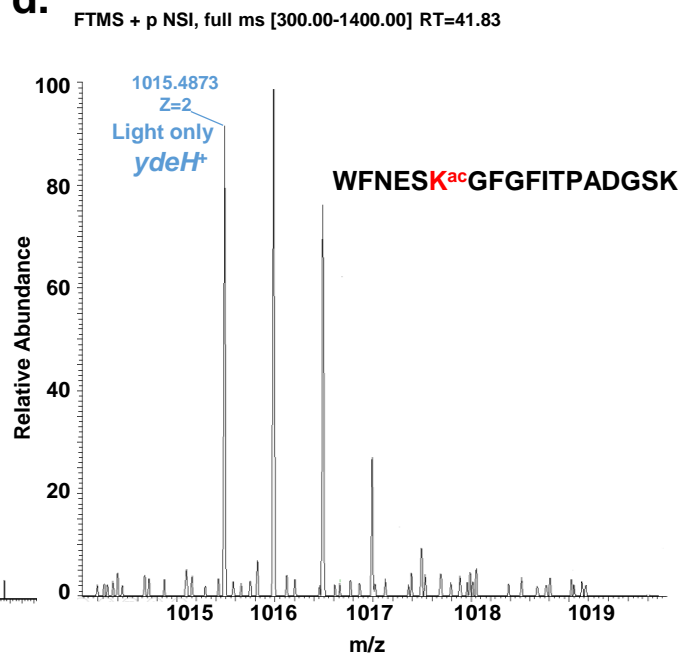

**a.**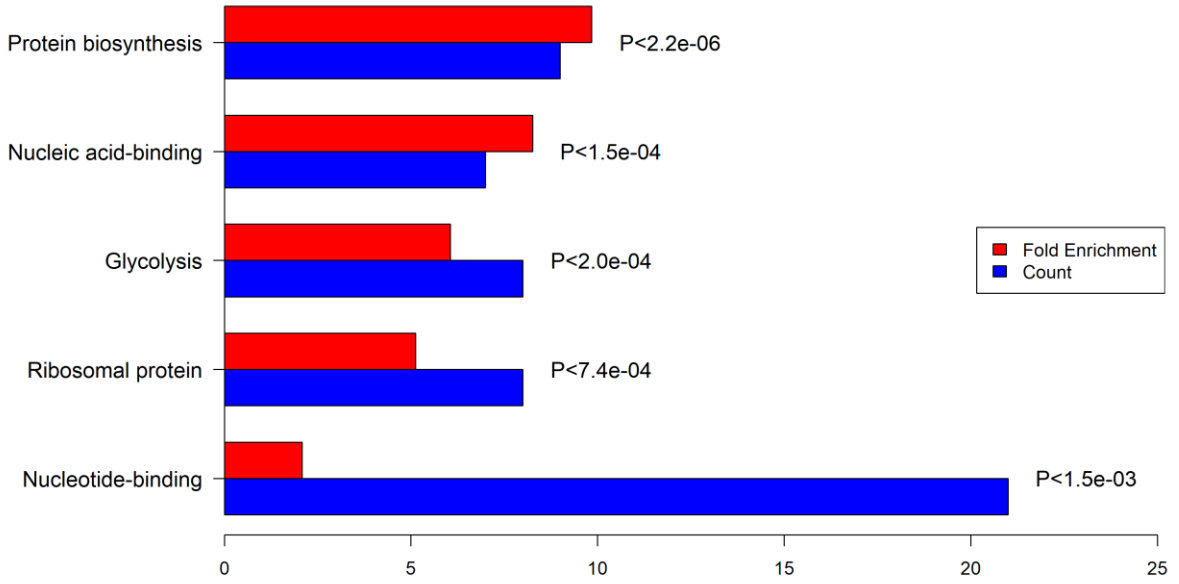**b.**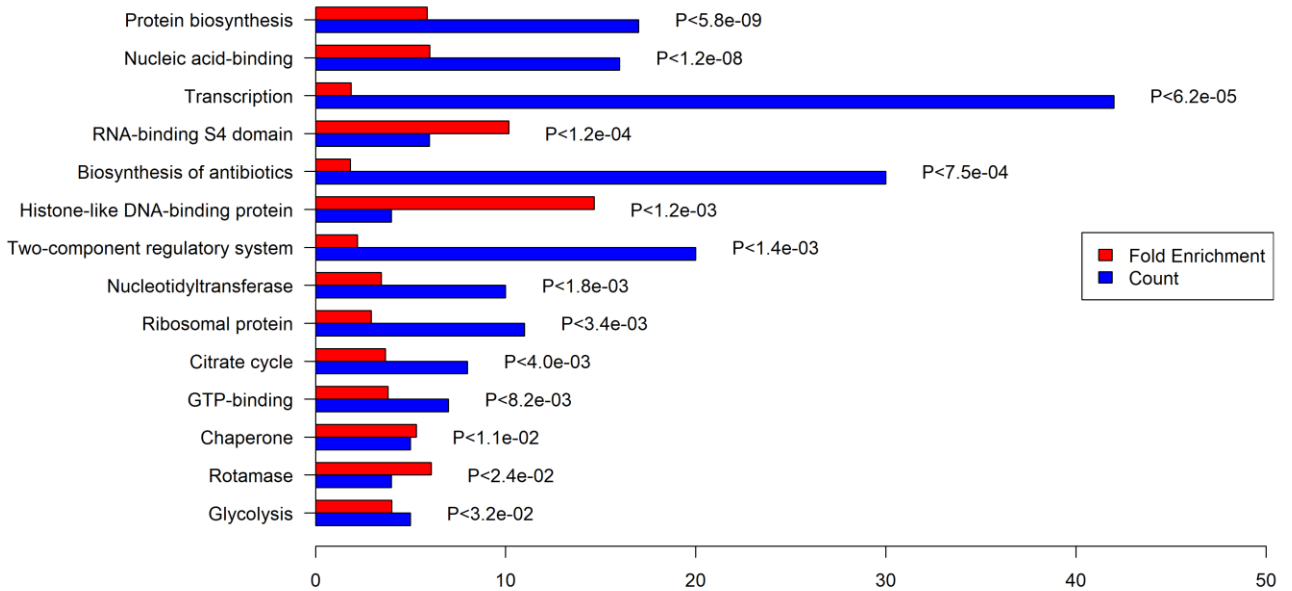

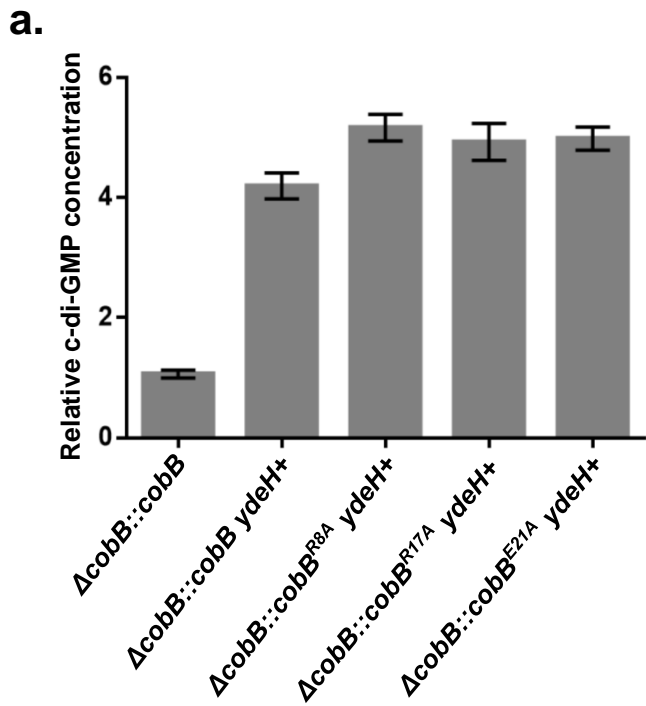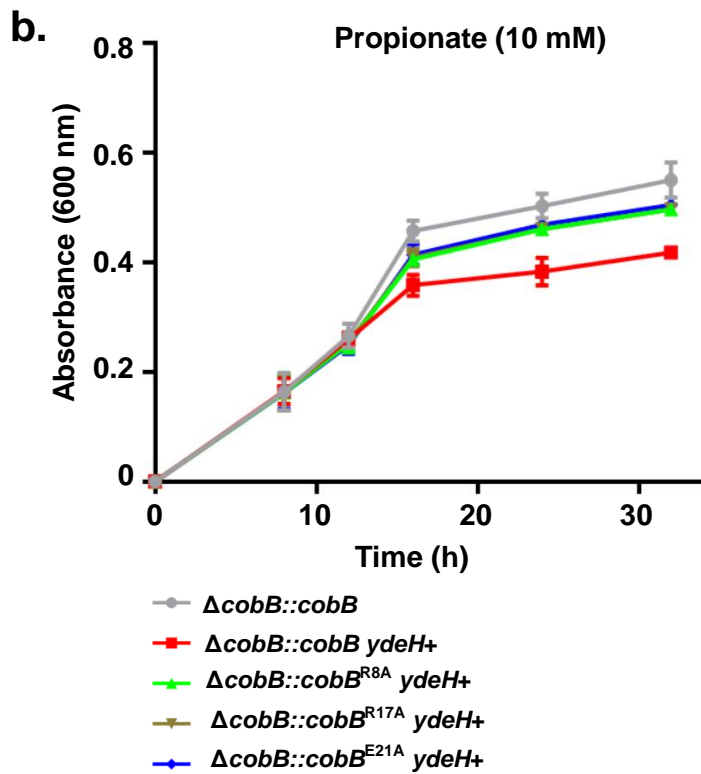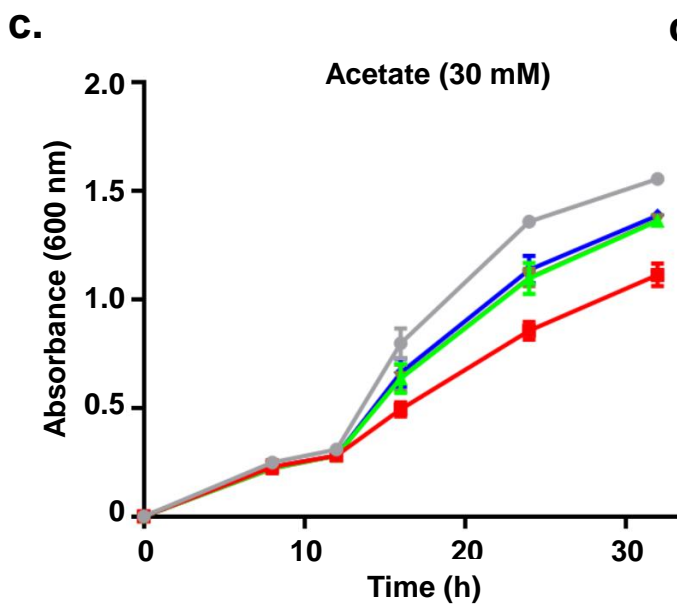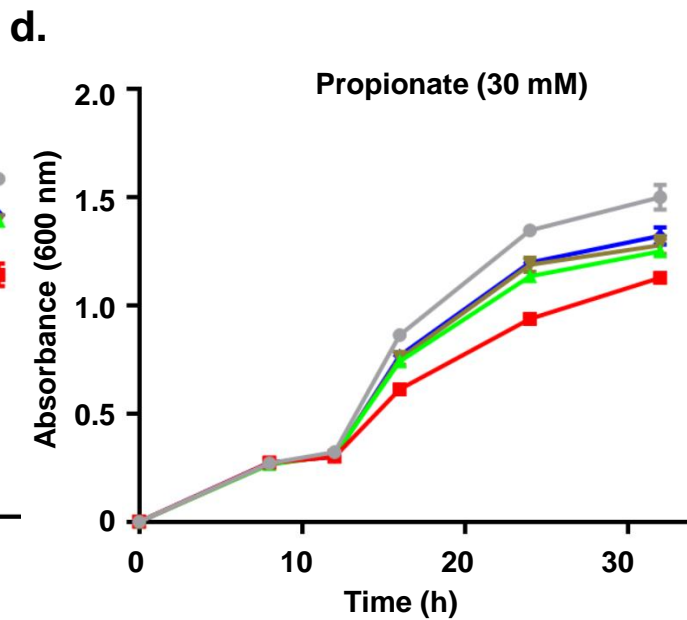



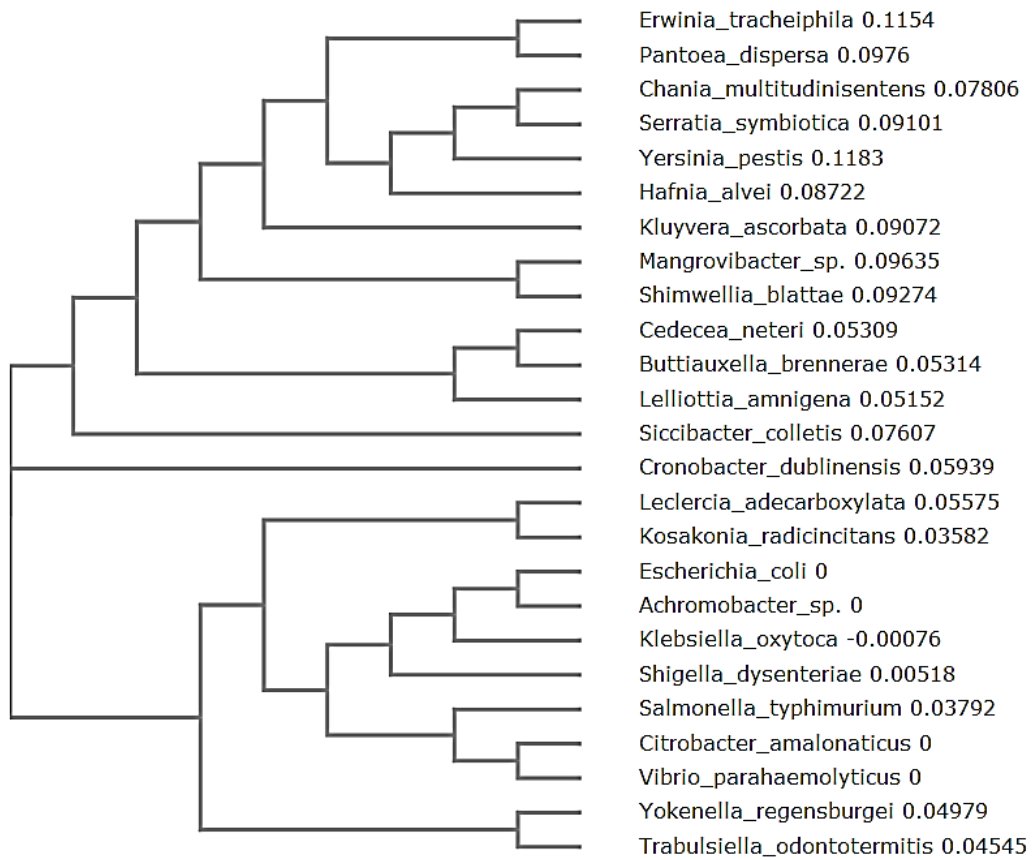

**Xu *et al.* Supplementary figure 9.**

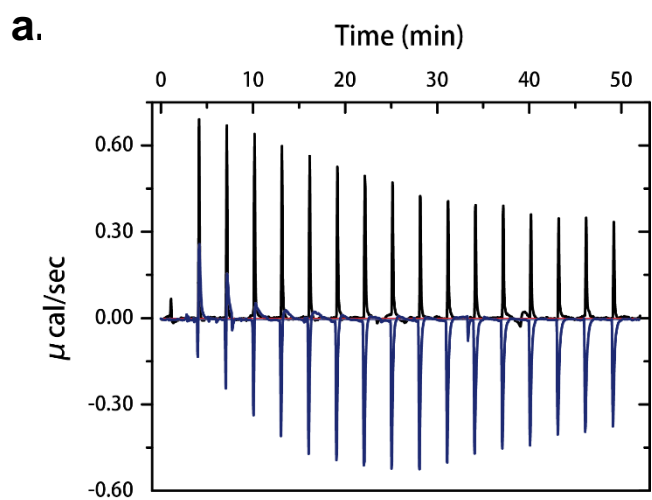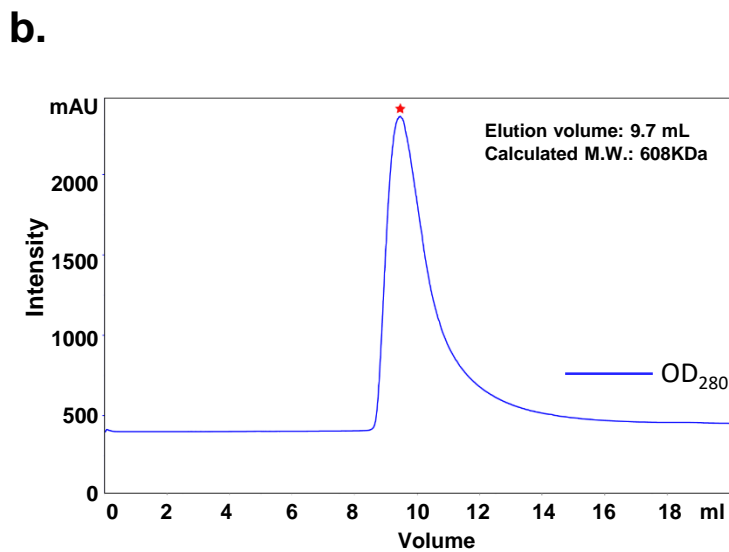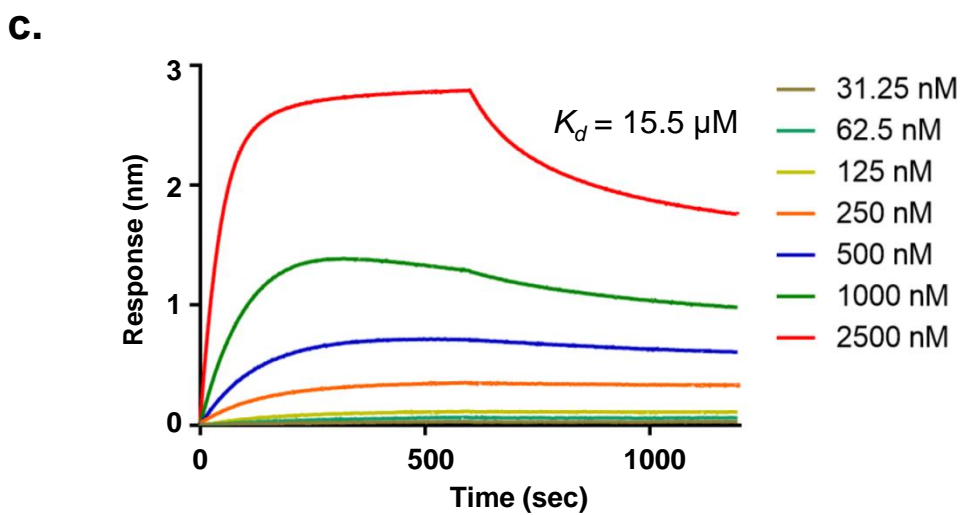

**a.**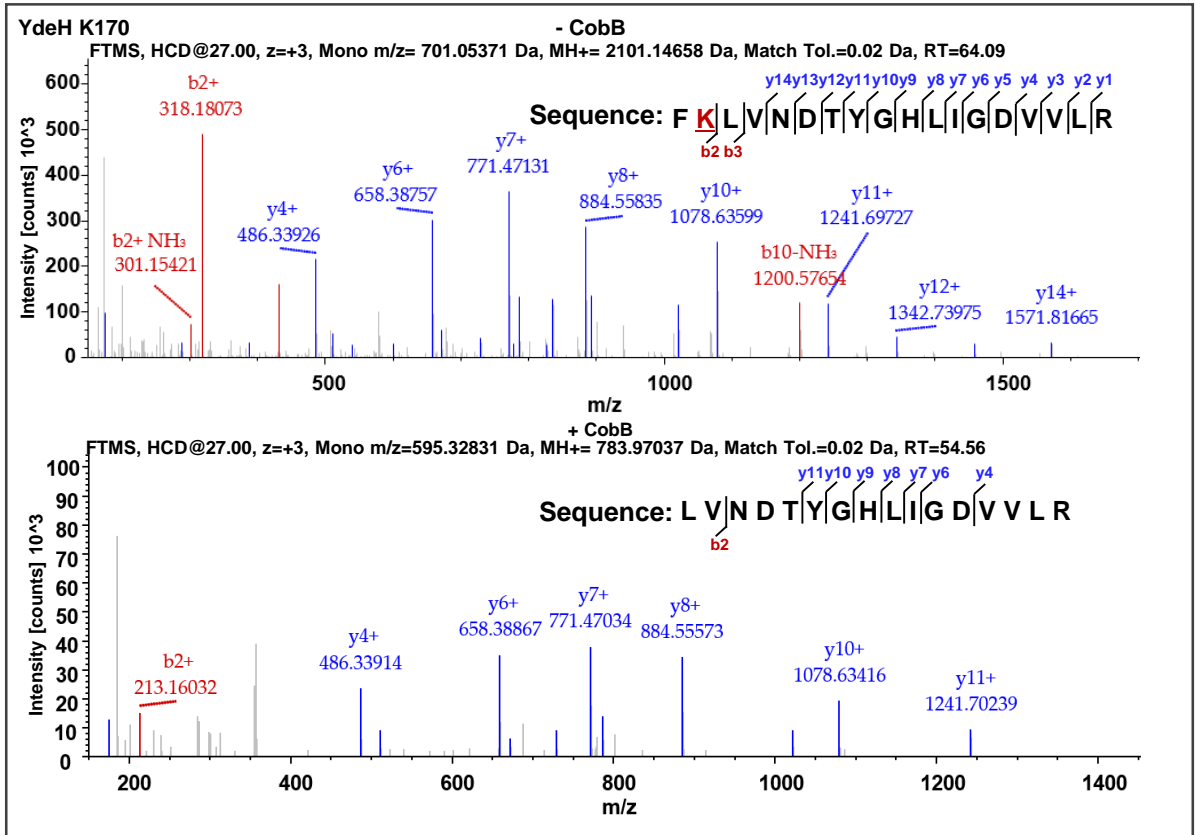**b.**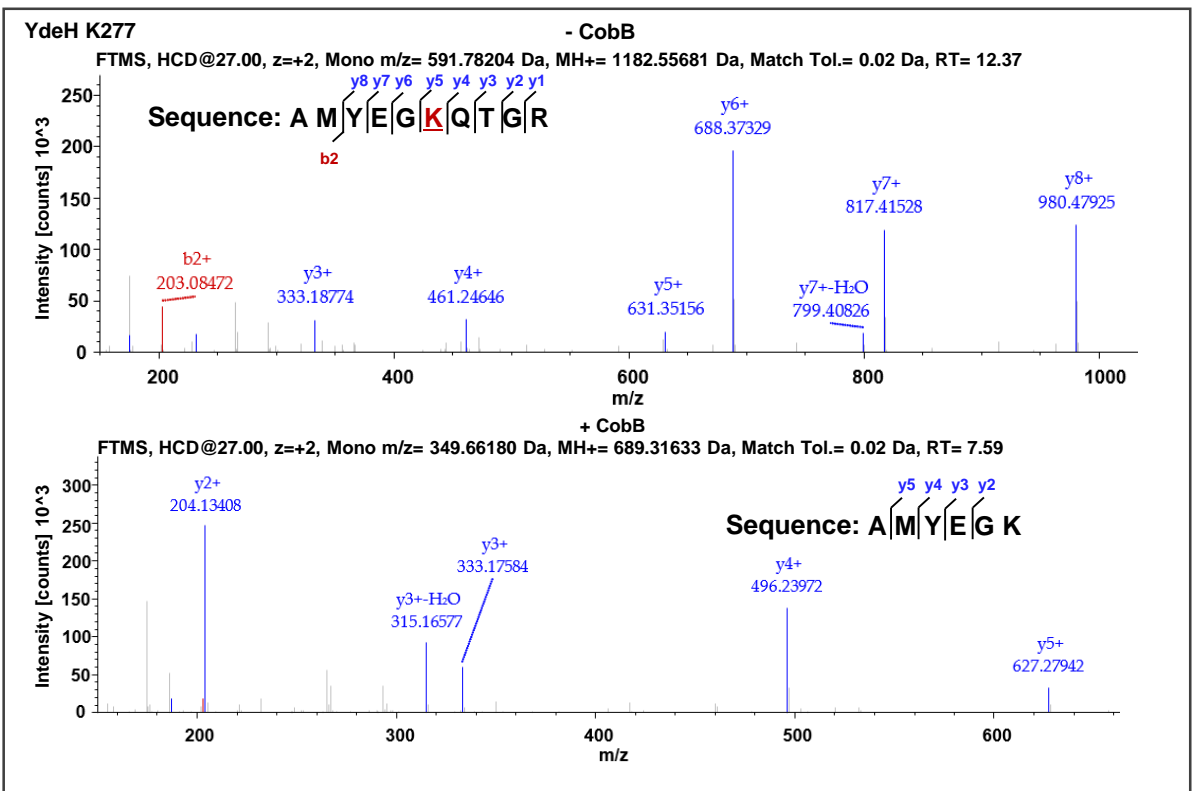

**a.**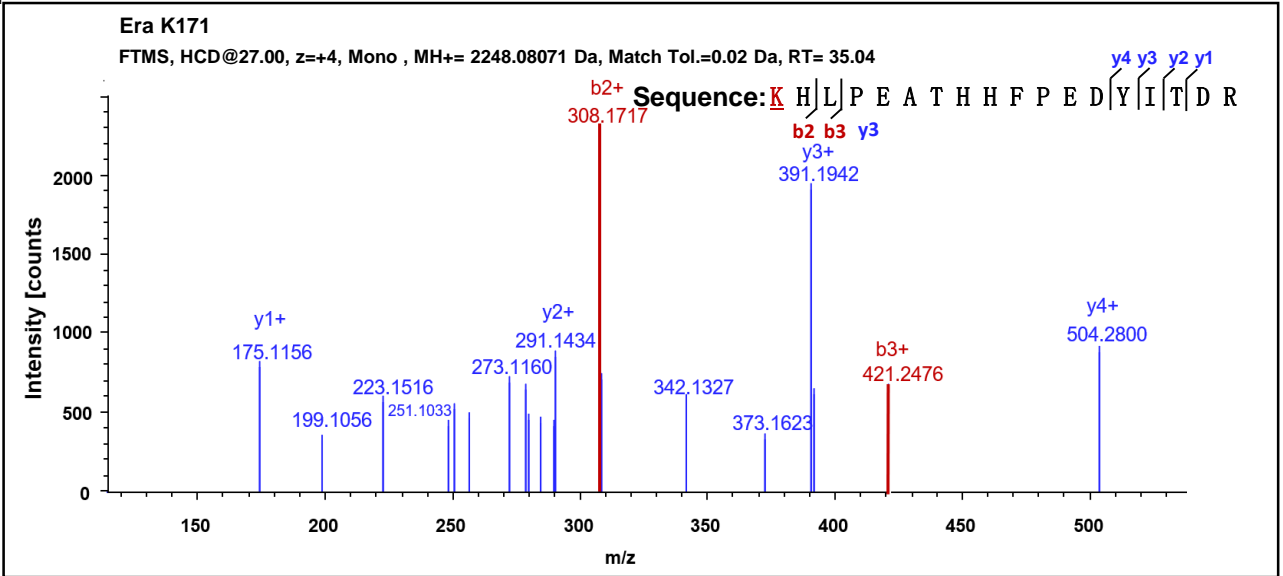**b.**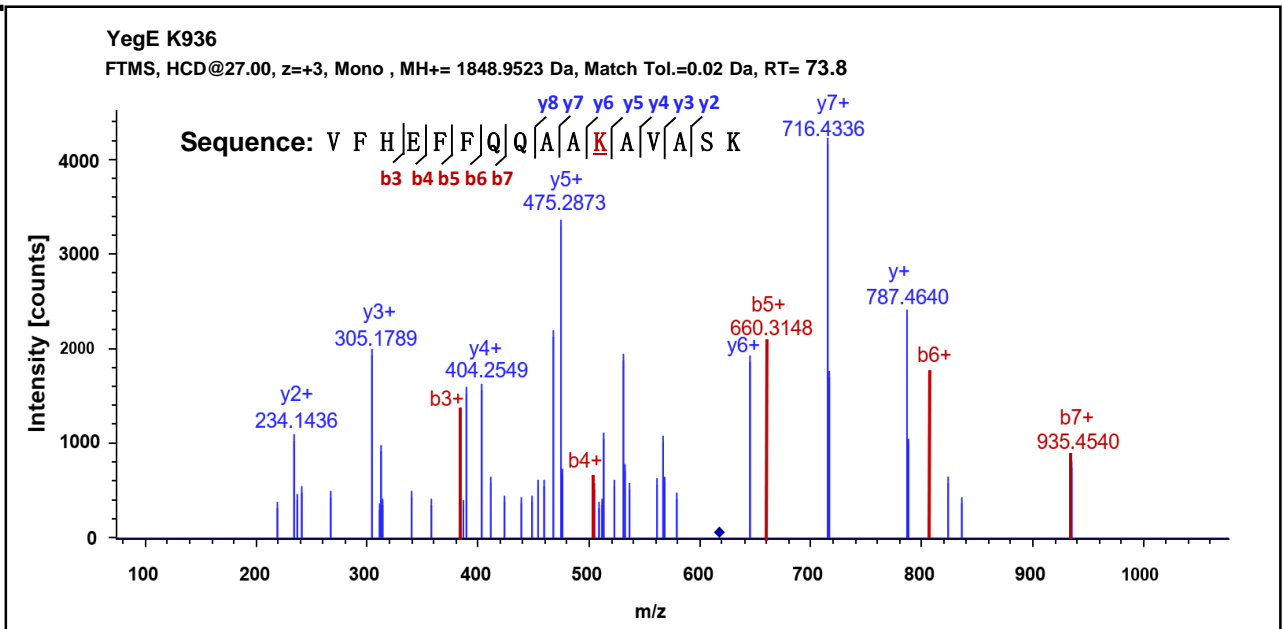

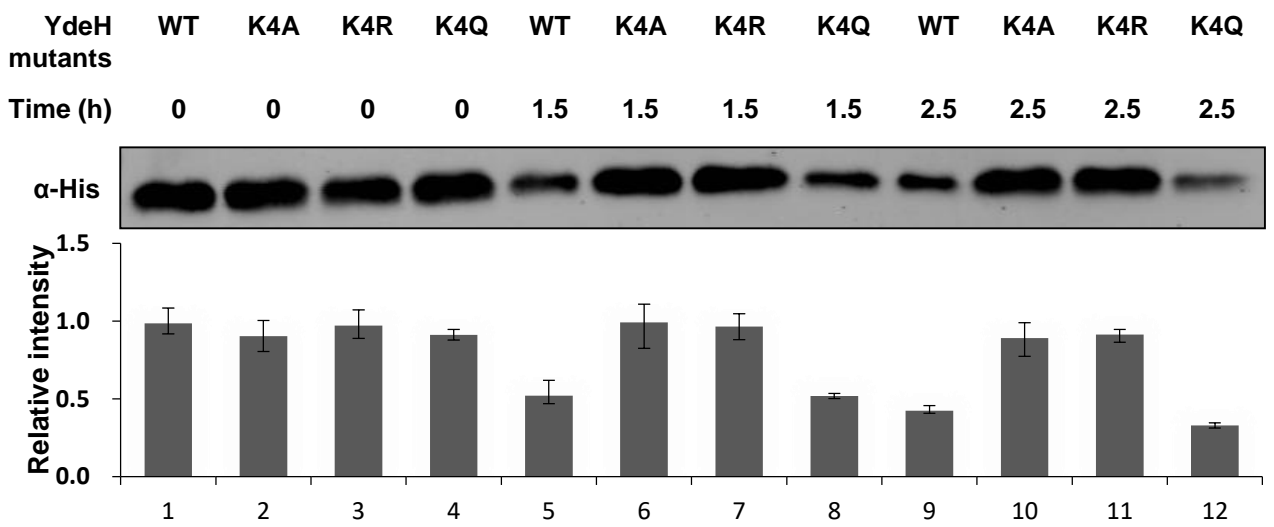

**Xu *et al.* Supplementary figure 13.**

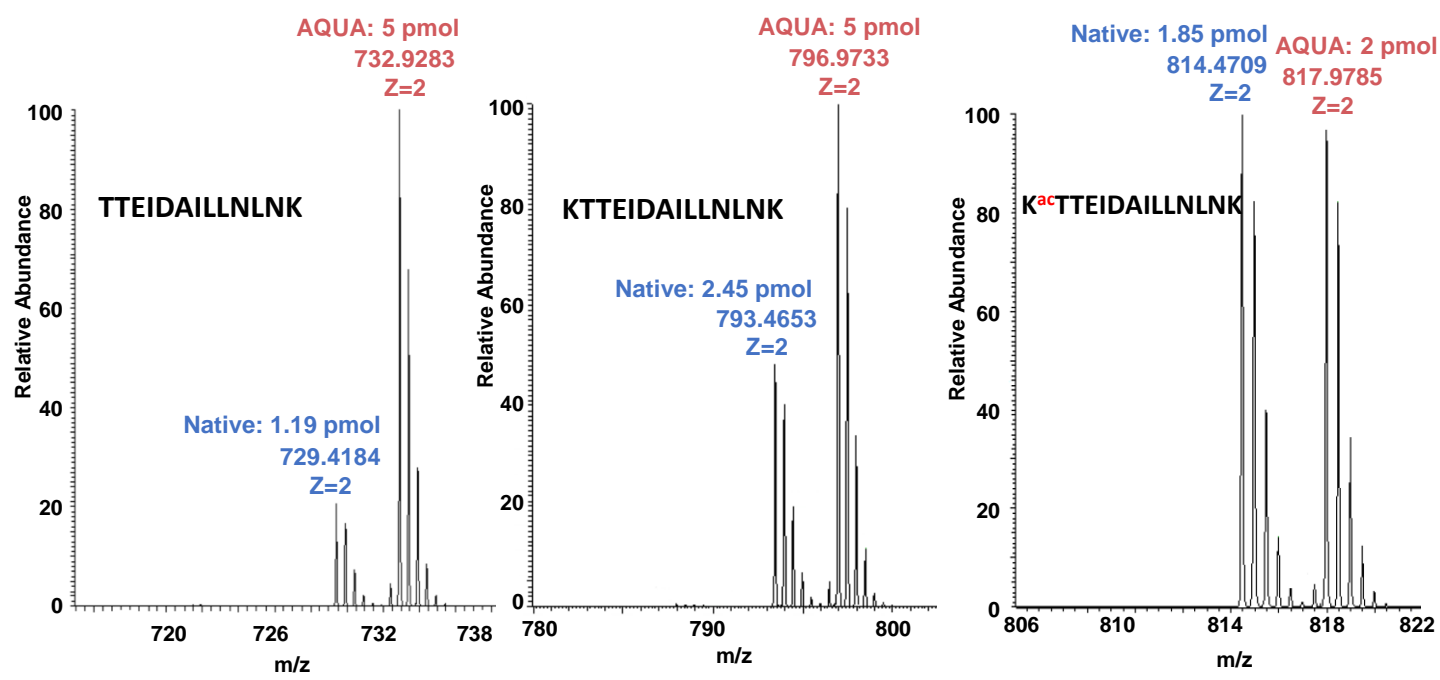

Xu *et al.* Supplementary figure 14.

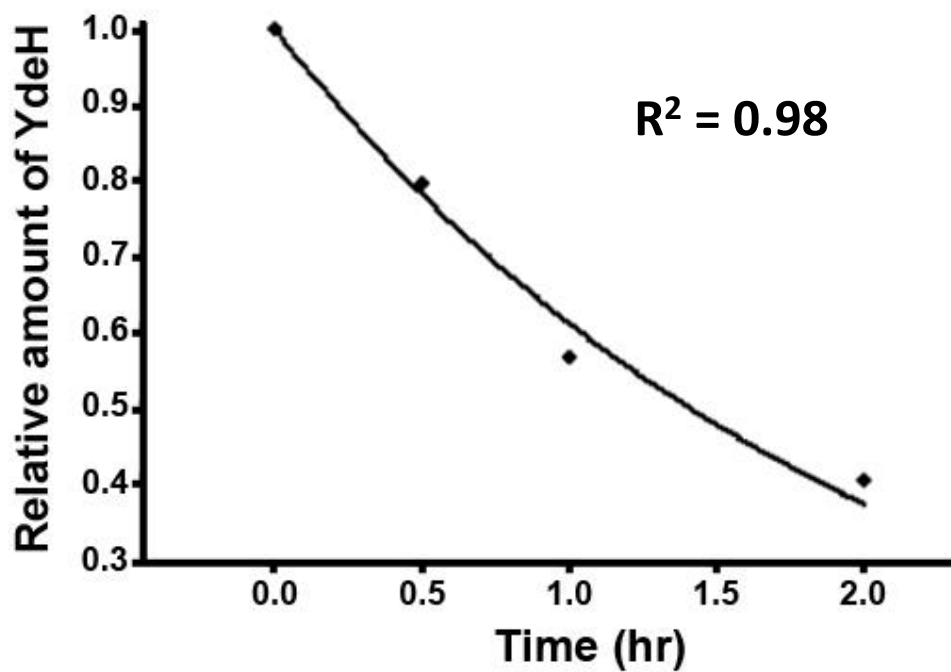

**Xu *et al.* Supplementary figure 15.**

**a.**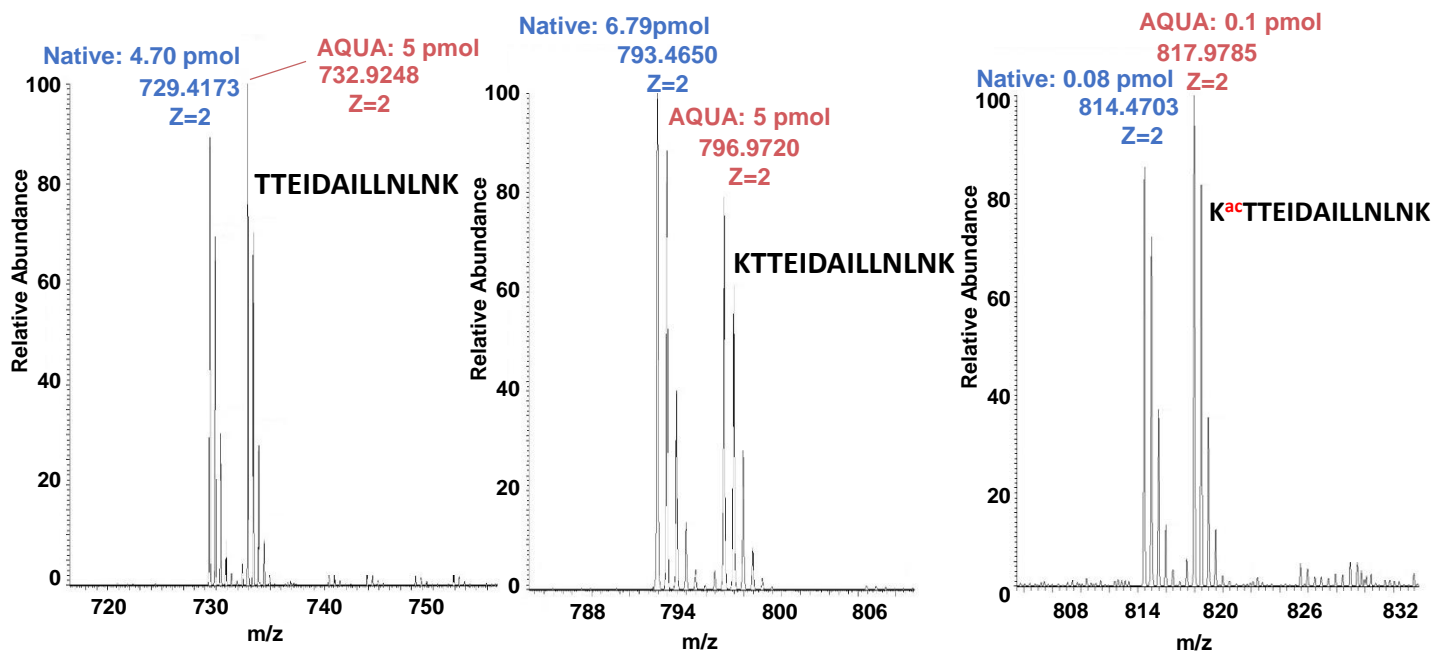**b.**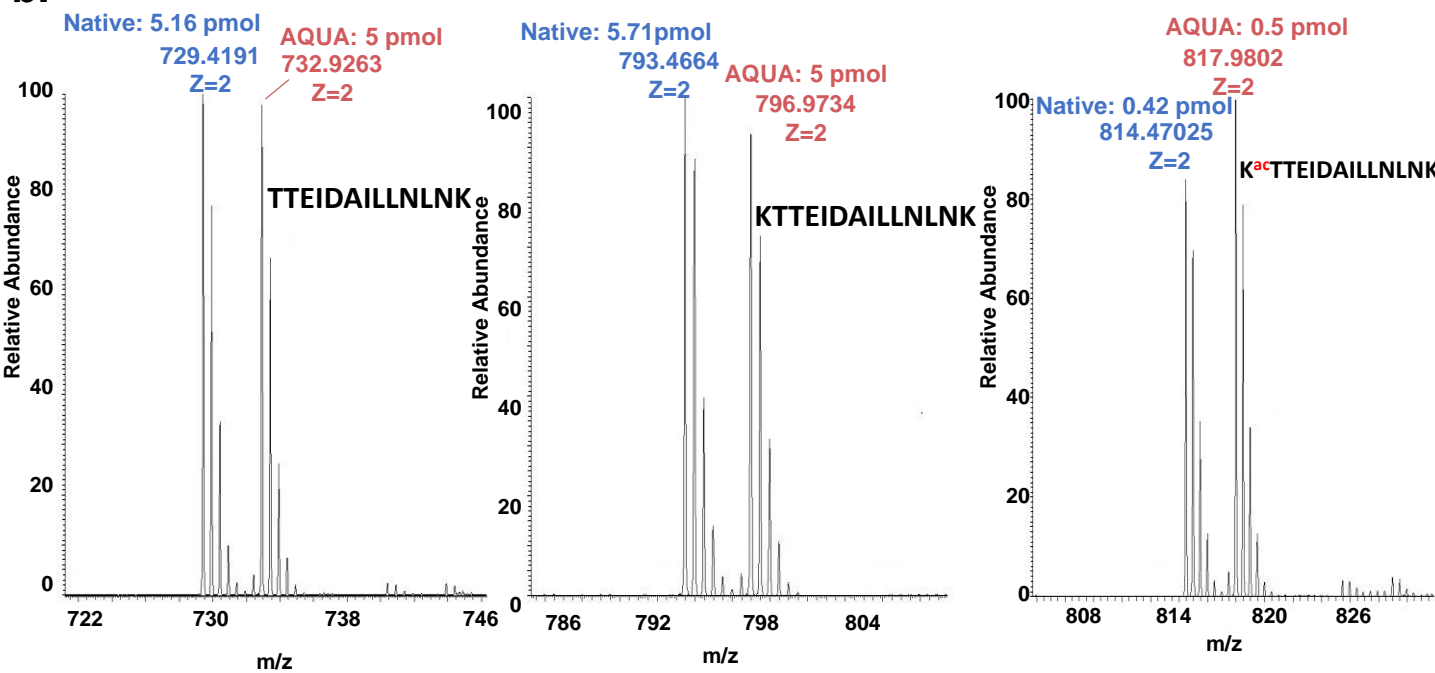**c.**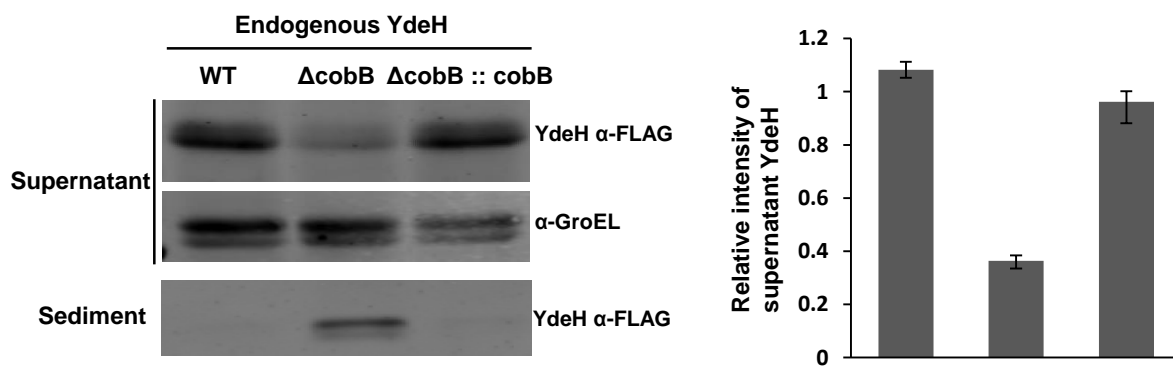



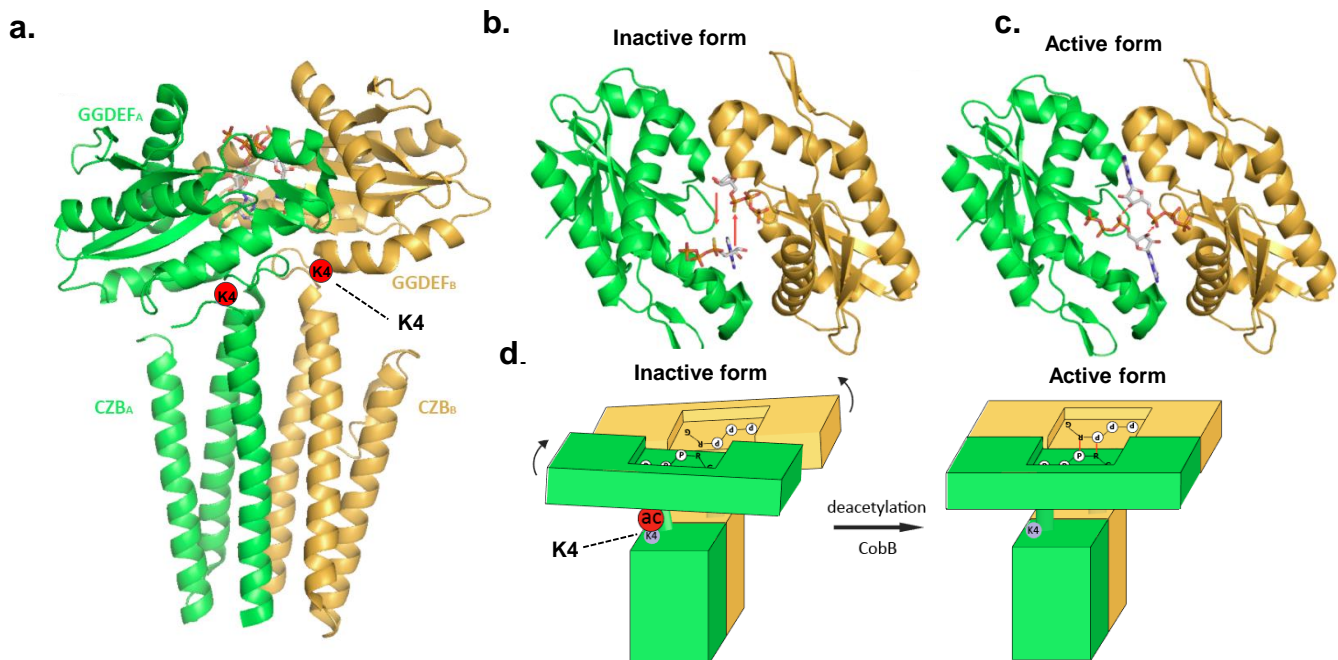

**Xu *et al.* Supplementary figure 17.**

| Time points (h) | 8                    | 24                              |                                                     |                                           |
|-----------------|----------------------|---------------------------------|-----------------------------------------------------|-------------------------------------------|
|                 | WT and $\Delta cobB$ | WT and <i>ydeH</i> <sup>+</sup> | $\Delta cobB:: cobB$ and $\Delta cobB:: cobB ydeH+$ | WT and <i>ydeH</i> <sup>G206A,G207A</sup> |
| Acetate         | 0.009                | 0.003                           | 0.005                                               | 0.758                                     |
| Propionate      | 0.0006               | 0.00002                         | 0.016                                               | 0.066                                     |
